# Supplementary material for: Association of antimicrobial resistance and gut microbiota composition in human and non-human primates at an urban ecotourism site
Source: Gut Pathog. 2020 Mar 10;12:14. doi: 10.1186/s13099-020-00352-x (PMC7063749; doi:10.1186/s13099-020-00352-x)
Supplement: Supplementary file 4 — Additional file 4: Table S2. The identity of significantly different KEGG orthologs detected using negative binomial log model. [file 13099_2020_352_MOESM4_ESM.xlsx]

## Sheet: Sheet1
LT vs H
	Description	Pathway_L1	Pathway_L2	Pathway_L3
K00091	dihydroflavonol-4-reductase [ec:1.1.1.219]	metabolism	biosynthesis of other secondary metabolites	flavonoid biosynthesis
K00358	None	unclassified	metabolism	others
K00998	phosphatidylserine synthase [ec:2.7.8.8]	metabolism	lipid metabolism	glycerophospholipid metabolism
		metabolism	amino acid metabolism	glycine, serine and threonine metabolism
K01599	uroporphyrinogen decarboxylase [ec:4.1.1.37]	metabolism	metabolism of cofactors and vitamins	porphyrin and chlorophyll metabolism
K01975	2'-5' rna ligase [ec:6.5.1.-]	unclassified	genetic information processing	translation proteins
K02025	multiple sugar transport system permease protein	environmental information processing	membrane transport	transporters
K02026	multiple sugar transport system permease protein	environmental information processing	membrane transport	transporters
K02397	flagellar hook-associated protein 3 flgl	cellular processes	cell motility	bacterial motility proteins
		cellular processes	cell motility	flagellar assembly
K02413	flagellar flij protein	cellular processes	cell motility	bacterial motility proteins
		cellular processes	cell motility	flagellar assembly
K02418	flagellar protein flio/fliz	cellular processes	cell motility	bacterial motility proteins
		cellular processes	cell motility	flagellar assembly
K02591	nitrogenase molybdenum-iron protein beta chain [ec:1.18.6.1]	metabolism	xenobiotics biodegradation and metabolism	chloroalkane and chloroalkene degradation
		metabolism	energy metabolism	nitrogen metabolism
K03093	rna polymerase sigma factor	genetic information processing	transcription	transcription machinery
K03408	purine-binding chemotaxis protein chew	cellular processes	cell motility	bacterial motility proteins
		cellular processes	cell motility	bacterial chemotaxis
		environmental information processing	signal transduction	two-component system
K03453	bile acid:na+ symporter, bass family	unclassified	cellular processes and signaling	other ion-coupled transporters
K03716	spore photoproduct lyase [ec:4.1.99.14	unclassified	genetic information processing	replication, recombination and repair proteins
K04757	anti-sigma b factor [ec:2.7.11.1]	unclassified	cellular processes and signaling	signal transduction mechanisms
K05593	aminoglycoside 6-adenylyltransferase [ec:2.7.7.-]	unclassified	metabolism	others
K06196	cytochrome c-type biogenesis protein	unclassified	cellular processes and signaling	electron transfer carriers
K06283	putative deor family transcriptional regulator, stage iii sporulation protein d	genetic information processing	transcription	transcription factors
K06331	spore coat protein i	unclassified	cellular processes and signaling	sporulation
K06383	stage ii sporulation protein ga (sporulation sigma-e factor processing peptidase) [ec:3.4.23.-]	metabolism	enzyme families	peptidases
K06976	none	unclassified	poorly charaterised	general function prediction only
K07112	none	unclassified	poorly charaterised	general function prediction only
K07706	two-component system, agra family, sensor histidine kinase agrc [ec:2.7.13.-]	metabolism	enzyme families	protein kinases
		environmental information processing	signal transduction	two component system
K13653	arac family transcriptional regulator	genetic information processing	transcription	transcription factors

## Sheet: Sheet2
SL vs H
	Description	Pathway_L1	Pathway_L2	Pathway_L3
K00662	aminoglycoside n3'-acetyltransferase [ec:2.3.1.81]	unclassified	metabolism	others
K00998	phosphatidylserine synthase [ec:2.7.8.8]	metabolism	lipid metabolism	glycerophospholipid metabolism
		metabolism	amino acid metabolism	glycine, serine and threonine metabolism
K01155	type ii restriction enzyme [ec:3.1.21.4]	unclassified	genetic informaiton processing	restriction enzyme
K01197	hyaluronoglucosaminidase [ec:3.2.1.35]	metabolism	glycan biosynthesis and metabolism	glycosaminoglycan degradation
		environmental information processing	signaling molecules and interaction	bacterial toxins
K01599	uroporphyrinogen decarboxylase [ec:4.1.1.37]	metabolism	metabolism of cofactors and vitamins	porphyrin and chlorophyll metabolism
K02413	flagellar flij protein	cellular processes	cell motility	bacterial motility proteins
		cellular processes	cell motility	flagellar assembly
K02418	flagellar protein flio/fliz	cellular processes	cell motility	bacterial motility proteins
		cellular processes	cell motility	flagellar assembly
K02484	two-component system, ompr family, sensor kinase [ec:2.7.13.3]	metabolism	enzyme families	protein kinases
		environmental information processing	signal transduction	two component system
K02586	nitrogenase molybdenum-iron protein alpha chain [ec:1.18.6.1]	metabolism	xenobiotics biodegradation and metabolism	chloroalkane and chloroalkene degradation
		metabolism	energy metabolism	nitrogen metabolism
K02587	nitrogenase molybdenum-cofactor synthesis protein nife	metabolism	energy metabolism	nitrogen metabolism
K02589	nitrogen regulatory protein pii 1	metabolism	energy metabolism	nitrogen metabolism
K02590	nitrogen regulatory protein pii 2	metabolism	energy metabolism	nitrogen metabolism
K02591	nitrogenase molybdenum-iron protein beta chain [ec:1.18.6.1]	metabolism	xenobiotics biodegradation and metabolism	chloroalkane and chloroalkene degradation
		metabolism	energy metabolism	nitrogen metabolism
K03453	bile acid:na+ symporter, bass family	unclassified	cellular processes and signaling	other ion-coupled transporters
K03716	spore photoproduct lyase [ec:4.1.99.14	unclassified	genetic information processing	replication, recombination and repair proteins
K04757	anti-sigma b factor [ec:2.7.11.1]	unclassified	cellular processes and signaling	signal transduction mechanisms
K06331	spore coat protein i	unclassified	cellular processes and signaling	sporulation
K06859	glucose-6-phosphate isomerase, archaeal [ec:5.3.1.9]	metabolism	carbohydrate metabolism	pentose phosphate pathway
		metabolism	carbohydrate metabolism	starch and sucrose metabolism
		metabolism	carbohydrate metabolism	glycolysis / gluconeogenesis
		metabolism	carbohydrate metabolism	mino sugar and nucleotide sugar metabolism
K06921	none	unclassified	poorly characterised	general function prediction only
K07118	none	unclassified	poorly characterised	general function prediction only
K07406	alpha-galactosidase [ec:3.2.1.22]	metabolism	lipid metabolism	glycerolipid metabolism
		metabolism	lipid metabolism	shingolipid metabolism
		metabolism	carbohydrate metabolism	galactose metabolism
K07706	two-component system, agra family, sensor histidine kinase agrc [ec:2.7.13.-]	metabolism	enzyme families	protein kinases
		environmental information processing	signal transduction	two component system
K08961	chondroitin-sulfate-abc endolyase/exolyase [ec:4.2.2.20 4.2.2.21]	unclassified	metabolism	others
K13016	udp-d-glcnaca oxidase [ec:1.1.1.-]	metabolism	glycan biosynthesis and metabolism	lipopolysaccharide biosynthesis proteins
K13653	arac family transcriptional regulator	genetic information processing	transcription	transcription factors

## Sheet: Sheet4
SL vs H
	Description	Pathway_L1	Pathway_L2	Pathway_L3
K00662	aminoglycoside n3'-acetyltransferase [ec:2.3.1.81]	unclassified	metabolism	others
K00998	phosphatidylserine synthase [ec:2.7.8.8]	metabolism	lipid metabolism	glycerophospholipid metabolism
		metabolism	amino acid metabolism	glycine, serine and threonine metabolism
K01155	type ii restriction enzyme [ec:3.1.21.4]	unclassified	genetic informaiton processing	restriction enzyme
K01197	hyaluronoglucosaminidase [ec:3.2.1.35]	metabolism	glycan biosynthesis and metabolism	glycosaminoglycan degradation
		environmental information processing	signaling molecules and interaction	bacterial toxins
K01599	uroporphyrinogen decarboxylase [ec:4.1.1.37]	metabolism	metabolism of cofactors and vitamins	porphyrin and chlorophyll metabolism
K02413	flagellar flij protein	cellular processes	cell motility	bacterial motility proteins
		cellular processes	cell motility	flagellar assembly
K02418	flagellar protein flio/fliz	cellular processes	cell motility	bacterial motility proteins
K02484	two-component system, ompr family, sensor kinase [ec:2.7.13.3]	metabolism	enzyme families	protein kinases
		environmental information processing	signal transduction	two component system
K02586	nitrogenase molybdenum-iron protein alpha chain [ec:1.18.6.1]	metabolism	xenobiotics biodegradation and metabolism	chloroalkane and chloroalkene degradation
		metabolism	energy metabolism	nitrogen metabolism
K02587	nitrogenase molybdenum-cofactor synthesis protein nife	metabolism	energy metabolism	nitrogen metabolism
K02589	nitrogen regulatory protein pii 1	metabolism	energy metabolism	nitrogen metabolism
K02590	nitrogen regulatory protein pii 2	metabolism	energy metabolism	nitrogen metabolism
K02591	nitrogenase molybdenum-iron protein beta chain [ec:1.18.6.1]	metabolism	xenobiotics biodegradation and metabolism	chloroalkane and chloroalkene degradation
K03453	bile acid:na+ symporter, bass family	unclassified	cellular processes and signaling	other ion-coupled transporters
K03716	spore photoproduct lyase [ec:4.1.99.14	unclassified	genetic information processing	replication, recombination and repair proteins
K04757	anti-sigma b factor [ec:2.7.11.1]	unclassified	cellular processes and signaling	signal transduction mechanisms
K06331	spore coat protein i	unclassified	cellular processes and signaling	sporulation
K06859	glucose-6-phosphate isomerase, archaeal [ec:5.3.1.9]	metabolism	carbohydrate metabolism	pentose phosphate pathway
		metabolism	carbohydrate metabolism	starch and sucrose metabolism
		metabolism	carbohydrate metabolism	glycolysis / gluconeogenesis
		metabolism	carbohydrate metabolism	mino sugar and nucleotide sugar metabolism
K06921	none	unclassified	poorly characterised	general function prediction only
K07118	none	unclassified	poorly characterised	general function prediction only
K07406	alpha-galactosidase [ec:3.2.1.22]	metabolism	lipid metabolism	glycerolipid metabolism
		metabolism	lipid metabolism	shingolipid metabolism
		metabolism	carbohydrate metabolism	galactose metabolism
K07706	two-component system, agra family, sensor histidine kinase agrc [ec:2.7.13.-]	metabolism	enzyme families	protein kinases
K08961	chondroitin-sulfate-abc endolyase/exolyase [ec:4.2.2.20 4.2.2.21]	unclassified	metabolism	others
K13016	udp-d-glcnaca oxidase [ec:1.1.1.-]	metabolism	glycan biosynthesis and metabolism	lipopolysaccharide biosynthesis proteins
K13653	arac family transcriptional regulator	genetic information processing	transcription	transcription factors

## Sheet: Sheet3
Table SX. Predicted functional metagenome comparison between MF, TC and HS
MF vs HS
	Description	Pathway_L1	Pathway_L2	Pathway_L3
K00091	dihydroflavonol-4-reductase [ec:1.1.1.219]	metabolism	biosynthesis of other secondary metabolites	flavonoid biosynthesis
K00358	None	unclassified	metabolism	others
K00998	phosphatidylserine synthase [ec:2.7.8.8]	metabolism	lipid metabolism	glycerophospholipid metabolism
		metabolism	amino acid metabolism	glycine, serine and threonine metabolism
K01599	uroporphyrinogen decarboxylase [ec:4.1.1.37]	metabolism	metabolism of cofactors and vitamins	porphyrin and chlorophyll metabolism
K01975	2'-5' rna ligase [ec:6.5.1.-]	unclassified	genetic information processing	translation proteins
K02025	multiple sugar transport system permease protein	environmental information processing	membrane transport	transporters
K02026	multiple sugar transport system permease protein	environmental information processing	membrane transport	transporters
K02397	flagellar hook-associated protein 3 flgl	cellular processes	cell motility	bacterial motility proteins
		cellular processes	cell motility	flagellar assembly
K02413	flagellar flij protein	cellular processes	cell motility	bacterial motility proteins
K02418	flagellar protein flio/fliz	cellular processes	cell motility	bacterial motility proteins
K02591	nitrogenase molybdenum-iron protein beta chain [ec:1.18.6.1]	metabolism	xenobiotics biodegradation and metabolism	chloroalkane and chloroalkene degradation
		metabolism	energy metabolism	nitrogen metabolism
K03093	rna polymerase sigma factor	genetic information processing	transcription	transcription machinery
K03408	purine-binding chemotaxis protein chew	cellular processes	cell motility	bacterial motility proteins
		cellular processes	cell motility	bacterial chemotaxis
		environmental information processing	signal transduction	two-component system
K03453	bile acid:na+ symporter, bass family	unclassified	cellular processes and signaling	other ion-coupled transporters
K03716	spore photoproduct lyase [ec:4.1.99.14	unclassified	genetic information processing	replication, recombination and repair proteins
K04757	anti-sigma b factor [ec:2.7.11.1]	unclassified	cellular processes and signaling	signal transduction mechanisms
K05593	aminoglycoside 6-adenylyltransferase [ec:2.7.7.-]	unclassified	metabolism	others
K06196	cytochrome c-type biogenesis protein	unclassified	cellular processes and signaling	electron transfer carriers
K06283	putative deor family transcriptional regulator, stage iii sporulation protein d	genetic information processing	transcription	transcription factors
K06331	spore coat protein i	unclassified	cellular processes and signaling	sporulation
K06383	stage ii sporulation protein ga (sporulation sigma-e factor processing peptidase) [ec:3.4.23.-]	metabolism	enzyme families	peptidases
K06976	none	unclassified	poorly charaterised	general function prediction only
K07112	none	unclassified	poorly charaterised	general function prediction only
K07706	two-component system, agra family, sensor histidine kinase agrc [ec:2.7.13.-]	metabolism	enzyme families	protein kinases
		environmental information processing	signal transduction	two component system
K13653	arac family transcriptional regulator	genetic information processing	transcription	transcription factors
TC vs HS
K00662	aminoglycoside n3'-acetyltransferase [ec:2.3.1.81]	unclassified	metabolism	others
K00998	phosphatidylserine synthase [ec:2.7.8.8]	metabolism	lipid metabolism	glycerophospholipid metabolism
		metabolism	amino acid metabolism	glycine, serine and threonine metabolism
K01155	type ii restriction enzyme [ec:3.1.21.4]	unclassified	genetic informaiton processing	restriction enzyme
K01197	hyaluronoglucosaminidase [ec:3.2.1.35]	metabolism	glycan biosynthesis and metabolism	glycosaminoglycan degradation
		environmental information processing	signaling molecules and interaction	bacterial toxins
K01599	uroporphyrinogen decarboxylase [ec:4.1.1.37]	metabolism	metabolism of cofactors and vitamins	porphyrin and chlorophyll metabolism
K02413	flagellar flij protein	cellular processes	cell motility	bacterial motility proteins
		cellular processes	cell motility	flagellar assembly
K02418	flagellar protein flio/fliz	cellular processes	cell motility	bacterial motility proteins
K02484	two-component system, ompr family, sensor kinase [ec:2.7.13.3]	metabolism	enzyme families	protein kinases
		environmental information processing	signal transduction	two component system
K02586	nitrogenase molybdenum-iron protein alpha chain [ec:1.18.6.1]	metabolism	xenobiotics biodegradation and metabolism	chloroalkane and chloroalkene degradation
		metabolism	energy metabolism	nitrogen metabolism
K02587	nitrogenase molybdenum-cofactor synthesis protein nife	metabolism	energy metabolism	nitrogen metabolism
K02589	nitrogen regulatory protein pii 1	metabolism	energy metabolism	nitrogen metabolism
K02590	nitrogen regulatory protein pii 2	metabolism	energy metabolism	nitrogen metabolism
K02591	nitrogenase molybdenum-iron protein beta chain [ec:1.18.6.1]	metabolism	xenobiotics biodegradation and metabolism	chloroalkane and chloroalkene degradation
K03453	bile acid:na+ symporter, bass family	unclassified	cellular processes and signaling	other ion-coupled transporters
K03716	spore photoproduct lyase [ec:4.1.99.14	unclassified	genetic information processing	replication, recombination and repair proteins
K04757	anti-sigma b factor [ec:2.7.11.1]	unclassified	cellular processes and signaling	signal transduction mechanisms
K06331	spore coat protein i	unclassified	cellular processes and signaling	sporulation
K06859	glucose-6-phosphate isomerase, archaeal [ec:5.3.1.9]	metabolism	carbohydrate metabolism	pentose phosphate pathway
		metabolism	carbohydrate metabolism	starch and sucrose metabolism
		metabolism	carbohydrate metabolism	glycolysis / gluconeogenesis
		metabolism	carbohydrate metabolism	mino sugar and nucleotide sugar metabolism
K06921	none	unclassified	poorly characterised	general function prediction only
K07118	none	unclassified	poorly characterised	general function prediction only
K07406	alpha-galactosidase [ec:3.2.1.22]	metabolism	lipid metabolism	glycerolipid metabolism
		metabolism	lipid metabolism	shingolipid metabolism
		metabolism	carbohydrate metabolism	galactose metabolism
K07706	two-component system, agra family, sensor histidine kinase agrc [ec:2.7.13.-]	metabolism	enzyme families	protein kinases
K08961	chondroitin-sulfate-abc endolyase/exolyase [ec:4.2.2.20 4.2.2.21]	unclassified	metabolism	others
K13016	udp-d-glcnaca oxidase [ec:1.1.1.-]	metabolism	glycan biosynthesis and metabolism	lipopolysaccharide biosynthesis proteins
K13653	arac family transcriptional regulator	genetic information processing	transcription	transcription factors
